# Supplementary material for: Golgi integral membrane protein 4 manipulates cellular proliferation, apoptosis, and cell cycle in human head and neck cancer
Source: PubMed Central journal article supplement (PMC6117616; doi:10.1042/bsr20180454), 2018-08-31
Supplement: bsr20180454_Supp1.pdf [file bsr20180454_Supp1.pdf]

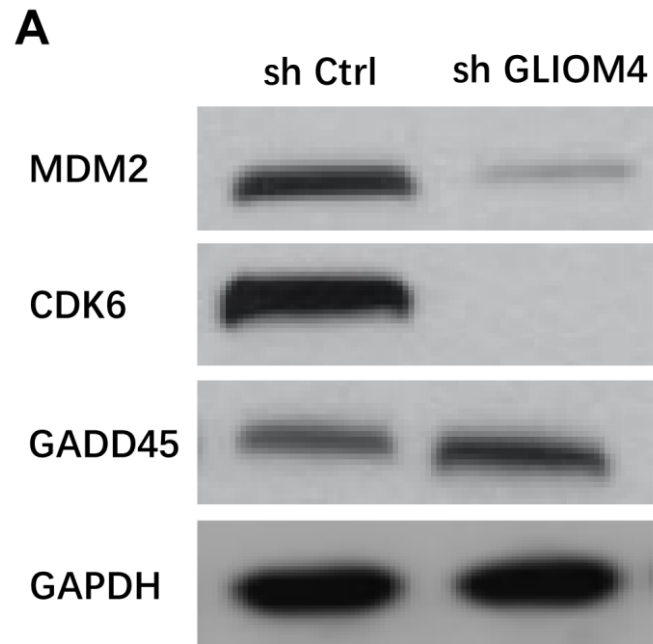

**Fig.S1 GOLIM4 affects the expression of MDM2, CDK6 and GADD45A.**

**A.** FaDu cells were infected with shCtrl or sh GOLIM4 for 48 h and then Western blot was performed to analyze the expression of MDM2, CDK6, and GADD45A.
